# Supplementary material for: Low empathy-like behaviour in male mice associates with impaired sociability, emotional memory, physiological stress reactivity and variations in neurobiological regulations
Source: PLoS One. 2017 Dec 4;12(12):e0188907. doi: 10.1371/journal.pone.0188907 (PMC5714342; doi:10.1371/journal.pone.0188907)
Supplement: S1 File — The Excel file contains the data sets of the three experiments, organized in three different sheets. (XLS) [file pone.0188907.s001.xls]

## Sheet: RAW DATA_EXP. 1
Animal ID	Group	Subgroup	Emotional contagion test						Resident-intruder test				Social approach test					Novel object recognition test					Cued fear-conditioning test				Corticosterone response to restraint stress						Hot-plate test	Trunk blood			Levels of BDNF (pg/ml)				Levels of oxytocin (pg/ml)				Levels of vasopressin (pg/ml)			TrkB
			duration (s) of paw-licking behaviour_0-5 min	duration (s) of paw-licking behaviour_6-10 min	duration (s) of paw-licking behaviour_11-15 min	duration (s) of paw-licking behaviour_16-20 min	duration (s) of paw-licking behaviour_21-25 min	duration (s) of paw-licking behaviour_26-30 min	anogenital sniffing & received grooming_day1	anogenital sniffing & received grooming_day2	anogenital sniffing & received grooming_day3	anogenital sniffing & received grooming_mean day1-3	sociability phase_time (s) in comp. A	sociability phase_time (s) in comp. B	preference for social novelty phase_time (s) in comp. A	preference for social novelty phase_time (s) in comp. B	baseline_crossing frequency	acquisition phase (10 min)_exploring A	acquisition phase (10 min)_exploring B	retention phase (10 min)_exploring A	retention phase (10 min)_exploring C	exploratory preference index	duration of freezing (s)_tone phase_baseline (0-180 s)	duration of freezing (s)_tone phase_test (181-780 s)	duration of freezing (s)_extinction phase_baseline (0-180 s)	duration of freezing (s)_extinction phase_test (181-380 s)	concentration (ng/ml) before a 25-min restraint stress (t0)	concentration (ng/ml) immediately after a 25-min restraint stress (t25)	concentration (ng/ml) 35 min after a 25-min restraint stress (t60)	concentration (ng/ml) 95 min after a 25-min restraint stress (t120)	concentration (ng/ml) 155 min after a 25-min restraint stress (t180)	Area Under the Curve (AUC)	latency (s) to the first front paw licking	basal level of corticosterone (ng/ml)	basal level of testosterone (ng/ml)	testosterone/corticosterone ratio	prefrontal cortex	striatum	hypothalamus	hippocampus	prefrontal cortex	striatum	hypothalamus	hippocampus	prefrontal cortex	striatum	hippocampus	prefrontal cortex	striatum
id_4.1	Observer (O)	Emotional Contagion Prone (ECP)	165.9	41.31	90.52	95.63	44.14	0	94.15	81.06	86.56	87.2567	453.37	68.52	227.38	235.49	4	67.85	50.45	29.41	39.53	0.573397	12.5		0.8	23.5	14.871	283.264	289.246	164.545	343.384	39920.4	12	59.89	21.4	0.357322	379.61	554.33	597.61	333.35	636.48	608.784	927.996	63.6222	753.299	86.526	74.7094	1.60387	0.898659
id_6.2	Observer (O)	Emotional Contagion Prone (ECP)	180.89	37.08	9.75	7.88	36.41	16.49	60.68	72.63	41.29	58.2	285.58	169.06	264.05	218.43	19	74.05	86.52	36.75	74.3	0.669068	83.4	403.2	16.4	61.5	40.619	480.103	253.418	113.348	116.846	29943	11	47.11	13	0.27595	400.07	400.07	769.5	314.82	545.869	729.721	646.732	646.732	40.0145	452.363	54.322	1.41126	0.3166
id_7.1	Observer (O)	Emotional Contagion Prone (ECP)	150.79	90.06	0	34.51	40.58	9.1	75.5	58.22	33.84	55.8533	230.59	156.52	178.25	217.05	18	77.7	56.5	18.5	65.42	0.779552	5.6	120.4	3.1	36	56.384	223.157	309.082	250.25	329.407	36829	11	74.23	0.11	0.00148188	438.26	438.26	886.69	492.39	975.814	746.918	605.163	135.766	19.2605	51.8094	185.034	2.09026	0.668226
id_9.1	Observer (O)	Emotional Contagion Prone (ECP)	158.65	92.04	101.42	120.28	10.04	31.44	62.39	107.41	69.31	79.7033	118.47	207.65	166.54	297.17	17	75.76	79.62	21.44	44.57	0.675201	44.4	386.7	10.3	29.2	48.218	303.802	367.92	166.467	171.136	33635.8	9	20.34	1.09	0.053589	479.66	428.35	426.73	274.4	782.903	451.619	449.895	498.982		602.633	59.9031	3.0218	0.601339
id_9.2	Observer (O)	Emotional Contagion Prone (ECP)	170.49	94.92	42.19	40.91	74.05	0	62.2	32.41	44.03	46.2133	362.89	151.05	271.68	189.9	25	66.49	64.58	28.39	38.09	0.572954	18.4	234.6	7.2	27.3	46.649	299.927	259.796	177.93	150.409	28712.5	8	25.96	6.89	0.265408	359.79	481.22	473.61	252.89	354.705	729.721	854.507	414.796		72.4251	190.339	2.08315	0.77724
id_9.3	Observer (O)	Emotional Contagion Prone (ECP)	167.51	60.66	16.6	65.44	1.94	0	69.65	74.73	37.68	60.6867	256.12	184.56	221.2	191.11	18	54.22	66.91	13.82	48.53	0.778348	64.9	505.2	15.2	141	49.646	338.806	383.057	247.351	179.449	40268.2	10	73.97	3.23	0.0436664	1124.57	462.68	719.43	251.8	764.639	242.074	966.562	414.796		81.8165		2.0859	0.806179
id_10.3	Observer (O)	Emotional Contagion Prone (ECP)	125.98	67.42	28.95	70.69	23.17	30.31	42.16	61	53.54	52.2333	202.89	276.69	114.47	193.82	18	92.08	66.51	40.73	49.05	0.546335	8.2	200.1	5.5	31.9	46.289	409.18	301.483	255.927	129.7	38089.1	7	5.357	0.24	0.0448012	455.08	455.08	426.71	186.7	861.863		758.802	509.573		931.226	125.028	1.34527	0.629362
id_1.1	Observer (O)	Emotional Contagion Resistant (ECR)	129.33	16.05	9.98	3.47	0	0	41.33	34.78	45.1	40.4033	289.7	126.28	267.49	184.04	26	87.43	65.22	36.49	51.4	0.584822	20.4	141.6	12.2	79.6	20.49	290.771	287.445	58.472	152.295	27021.9	10	12.09	3.31	0.27378	555.35	672.46	615.22	349.3	145.357	1026.93	1026.93		226.118		248.598	2.19379	0.744279
id_2.1	Observer (O)	Emotional Contagion Resistant (ECR)	135.93	19	5.74	8.61	9.74	0					300.1	203.33	186.57	223.42	21	72.15	71.42	42.19	58.52	0.581074	24.6	177.9	1.8	7.2	51.563	224.762	234.619	117.23	202.942	22372.5	9	4.474	1.84	0.411265	603.69	551.07	714.56	288.99	511.98	1081.65	1026.93	1016.79	150.858	1288.79	263.49	1.56137	1.18042
id_3.2	Observer (O)	Emotional Contagion Resistant (ECR)	99.5	6.67	9.41	40.84	18.35	0	61.45	22.77	64.91	49.71	336.62	158.07	248.65	184.09	18	71.43	87.17	31.99	37.34	0.538584	20.4	28.5	0.5	5.3	53.033	256.531	110.217	115.939	91.919	13762.1	12	55.34	0.11	0.00198771	659.88	503.87	932.01	310.04	713.028	696.819	1344.05	605.163	57.0838	1020.31	139.785	1.86059	0.688492
id_5.2	Observer (O)	Emotional Contagion Resistant (ECR)	98.42	23.02	11.68	2.9	0.84	0	44.88	99.42	29.1	57.8	345.71	160.77	120.05	303.92	11	56.67	61.16	51.49	62.24	0.547261	24	100.9	4.6	6.8	21.741	555.908	169.946	66.772	83.154	27609	10	16.25	1.61	0.0990769	333.95	478.53	763.87	327.03	1140.32	975.814	883.203	646.732			183.301	1.82324	0.68673
id_5.3	Observer (O)	Emotional Contagion Resistant (ECR)	108.06	40.59	14.94	7.46	0	1.74	17.04	10.39	10.13	12.52	310.65	143.42	173.51	285	11	73.06	84.64	31.02	54.28	0.636342	0	182.2	1.4	31.4	37.451	251.892	291.321	156.268	85.059	27049.3	7	86.46	0.986	0.0114041	497.21	458.81	782.18	510.75	650.923	681.077	1171.25	776.789	64.0369	1561.47	560.119	1.52522	0.621409
id_6.1	Observer (O)	Emotional Contagion Resistant (ECR)	103.79	5.32	0	0	10.78	0	47.57	22.6	21.03	30.4	346.87	170.99	153.57	245.07	39	83.45	78.7	34.42	47.4	0.57932	30.9	278	21.3	8.2	30.234	391.418	331.97	171.411	198.401	38683.6	12	38.98	2.29	0.0587481	360.56	429.4	652.56	481.03	782.903	821.155	1222.56	554.815	110.119	223.964	553.92	1.42944	1.01234
id_8.1	Observer (O)	Emotional Contagion Resistant (ECR)	94.18	23.12	0	0	0	0	35.64	10.95	5.88	17.49	371.94	133.41	158.1	224.97	35	71.73	48.68	22.41	27.67	0.552516	90.2	205.5	17.6	99.3	46.222	234.802	287.781	262.054	229.346	35575.1	12	49.01	0.2	0.0040808	376.71	635.6	712.88	290.35	883.203	729.721	618.635	592.057	45.1378	1585.57	273.972	1.43621	0.98195
id_1.2	Observer (O)	Intermediate quartiles (Int. q.)	99.63	41.91	12.81	10.78	20.89	0
id_1.3	Observer (O)	Intermediate quartiles (Int. q.)	132.83	30.3	26.66	22.89	10.74	0
id_2.2	Observer (O)	Intermediate quartiles (Int. q.)	134.93	3.17	36.6	10.1	9.54	19.42
id_2.3	Observer (O)	Intermediate quartiles (Int. q.)	147.71	25.93	0	14.15	0	31.16
id_3.1	Observer (O)	Intermediate quartiles (Int. q.)	126.59	17.65	57.61	73.61	33.07	6.31
id_3.3	Observer (O)	Intermediate quartiles (Int. q.)	127.39	55.89	0	0	4.34	39.71
id_4.2	Observer (O)	Intermediate quartiles (Int. q.)	123.2	63.56	32.87	25.09	1.43	9.81
id_4.3	Observer (O)	Intermediate quartiles (Int. q.)	113.08	4.1	7.31	35	33.97	31.86
id_5.1	Observer (O)	Intermediate quartiles (Int. q.)	119.09	40.21	11.34	13.88	1.43	2.74
id_6.3	Observer (O)	Intermediate quartiles (Int. q.)	92.81	18.14	4.74	24.27	70.55	0
id_7.2	Observer (O)	Intermediate quartiles (Int. q.)	122.66	23.31	0	0.53	25.85	6.62
id_7.3	Observer (O)	Intermediate quartiles (Int. q.)	105.69	37.59	1.06	10.77	69.44	2.61
id_8.2	Observer (O)	Intermediate quartiles (Int. q.)	201.1	8.38	3.99	40	23.73	6.05
id_8.3	Observer (O)	Intermediate quartiles (Int. q.)	189.41	3.27	0	27.34	17.39	0
id_10.1	Observer (O)	Intermediate quartiles (Int. q.)	120.84	50.58	4.47	58.31	11.94	0.5
id_10.2	Observer (O)	Intermediate quartiles (Int. q.)	152.99	60.91	28.08	41.33	0	0
id_11.0	Control (CTRL)	Control (CTRL)	31.6	73.32	6.56	0	1.69	4.47
id_11.1	Control (CTRL)	Control (CTRL)	3.5	11.01	0	3.47	0	0
id_11.2	Control (CTRL)	Control (CTRL)	19.85	3.1	11.21	6.64	0	0
id_11.3	Control (CTRL)	Control (CTRL)	58.66	1.9	3.07	8.01	17.92	0
id_11.4	Control (CTRL)	Control (CTRL)	70.64	0	1.33	0	0	0
id_1.0	Demonstrator (D)	Demonstrator (D)	112.15	82.03	105.76	25.36	12.18	4.47
id_2.0	Demonstrator (D)	Demonstrator (D)	60.4	42.64	32.34	20.48	45.86	17.36
id_3.0	Demonstrator (D)	Demonstrator (D)	198.4	90.66	73	33.43	44.7	73.28
id_4.0	Demonstrator (D)	Demonstrator (D)	111.97	37.07	69.46	76.75	21.37	84.12
id_5.0	Demonstrator (D)	Demonstrator (D)	12.3	43.36	52.46	61.38	37.98	6.36
id_6.0	Demonstrator (D)	Demonstrator (D)	193.57	43.62	81.46	145.98	0	16.37
id_7.0	Demonstrator (D)	Demonstrator (D)	77.89	42.35	105.58	85.81	19.85	0
id_8.0	Demonstrator (D)	Demonstrator (D)	68.19	97.08	87.94	19.18	38.3	9.17
id_9.0	Demonstrator (D)	Demonstrator (D)	185.52	97.53	37.73	106.97	98.66	0
id_10.0	Demonstrator (D)	Demonstrator (D)	139.66	109.09	236.07	68.16	44.37	102.22
[truncated: 26 more columns]

## Sheet: RAW DATA_EXP. 2
Animal ID	Group	Subgroup	Emotional contagion test	Formalin test
			duration (s) of paw-licking behaviour	duration (s) of paw-licking behaviour
id_39.2	Observer (O)	Emotional Contagion Prone (ECP)	68.32	18.28
id_13.1	Observer (O)	Emotional Contagion Prone (ECP)	74.36	93.72
id_11.1	Observer (O)	Emotional Contagion Prone (ECP)	78.2	62
id_1.1	Observer (O)	Emotional Contagion Prone (ECP)	78.48	46.84
id_15.3	Observer (O)	Emotional Contagion Prone (ECP)	80.92	55.625
id_12.2	Observer (O)	Emotional Contagion Prone (ECP)	86.2	95.48
id_13.3	Observer (O)	Emotional Contagion Prone (ECP)	88.64	43.12
id_36.2	Observer (O)	Emotional Contagion Resistant (ECR)	38.44	24.44
id_30.2	Observer (O)	Emotional Contagion Resistant (ECR)	38.64	36.44
id_31.3	Observer (O)	Emotional Contagion Resistant (ECR)	40.32	52.64
id_21.2	Observer (O)	Emotional Contagion Resistant (ECR)	41.16	34.36
id_18.3	Observer (O)	Emotional Contagion Resistant (ECR)	55.84	19.24
id_5.3	Observer (O)	Emotional Contagion Resistant (ECR)	59.52	75.48
id_38.1	Observer (O)	Emotional Contagion Resistant (ECR)	63.44	16.4
id_35.3	Observer (O)	Intermediate quartiles (Int. q.)	63.49
id_25.1	Observer (O)	Intermediate quartiles (Int. q.)	63.62
id_21.1	Observer (O)	Intermediate quartiles (Int. q.)	63.8
id_39.3	Observer (O)	Intermediate quartiles (Int. q.)	63.8
id_32.2	Observer (O)	Intermediate quartiles (Int. q.)	63.97
id_34.3	Observer (O)	Intermediate quartiles (Int. q.)	64.11
id_10.3	Observer (O)	Intermediate quartiles (Int. q.)	64.16
id_28.1	Observer (O)	Intermediate quartiles (Int. q.)	64.56
id_30.3	Observer (O)	Intermediate quartiles (Int. q.)	64.72
id_19.1	Observer (O)	Intermediate quartiles (Int. q.)	65.76
id_5.2	Observer (O)	Intermediate quartiles (Int. q.)	66.16
id_7.3	Observer (O)	Intermediate quartiles (Int. q.)	66.71
id_2.2	Observer (O)	Intermediate quartiles (Int. q.)	67.63
id_4.3	Observer (O)	Intermediate quartiles (Int. q.)	68.01

## Sheet: RAW DATA_EXP. 3
Animal ID	Group	Type of partition	Emotional contagion test with and without visual contact
			duration (s) of paw-licking behaviour
id_2	Observer (O)	opaque	28.08
id_4	Observer (O)	opaque	57.52
id_6	Observer (O)	opaque	63.84
id_8	Observer (O)	opaque	66.24
id_10	Observer (O)	opaque	80
id_12	Observer (O)	opaque	107
id_14	Observer (O)	opaque	117.6
id_16	Observer (O)	opaque	13.24
id_18	Observer (O)	opaque	18.04
id_20	Observer (O)	opaque	45.36
id_22	Observer (O)	opaque	45.8
id_24	Observer (O)	opaque	56.04
id_26	Observer (O)	opaque	58.32
id_28	Observer (O)	opaque	71.16
id_1	Observer (O)	transparent and perforated	43.76
id_3	Observer (O)	transparent and perforated	48.4
id_5	Observer (O)	transparent and perforated	63.72
id_7	Observer (O)	transparent and perforated	73.36
id_9	Observer (O)	transparent and perforated	79.72
id_11	Observer (O)	transparent and perforated	111.84
id_13	Observer (O)	transparent and perforated	116.64
id_15	Observer (O)	transparent and perforated	4.12
id_17	Observer (O)	transparent and perforated	24.6
id_19	Observer (O)	transparent and perforated	29.4
id_21	Observer (O)	transparent and perforated	40.9911
id_23	Observer (O)	transparent and perforated	42.24
id_25	Observer (O)	transparent and perforated	44.56
id_27	Observer (O)	transparent and perforated	45.92
